# Supplementary material for: Nanotopography as a trigger for the microscale, autogenous and passive lysis of erythrocytes
Source: Royal Society of Chemistry journal article supplement (doi:10.1039/c4tb00239c), 2014-01-01
Supplement: c4tb00239c1.pdf [file c4tb00239c1.pdf]

## Supporting Information

### Nanotopography as a trigger for the microscale, autogenous and passive lysis of erythrocytes

Vy T. H. Pham,<sup>a</sup> Vi Khanh Truong,<sup>a</sup> David E. Mainwaring,<sup>a</sup> Yachong Guo,<sup>b</sup> Vladimir A. Baulin,<sup>b</sup> Mohammad Al Kobaisi,<sup>a</sup> Gediminas Gervinskas,<sup>c</sup> Saulius Juodkazis,<sup>c,d</sup> Wendy R. Zeng,<sup>a</sup> Pauline P. Doran,<sup>a</sup> Russell J. Crawford,<sup>a</sup> Elena P. Ivanova<sup>\*a</sup>

<sup>a</sup>Department of Chemistry and Biotechnology, School of Science, Faculty of Science, Engineering and Technology, Swinburne University of Technology, PO BOX 218, Hawthorn, Victoria, 3122, Australia.

<sup>b</sup>Department d'Enginyeria Quimica, Universitat Rovira I Virgili, 26 Av. dels Paisos Catalans, 43007 Tarragona, Spain.

<sup>c</sup>Centre for Micro-Photonics, School of Science, Faculty of Science, Engineering and Technology, Swinburne University of Technology, PO BOX 218, Hawthorn, Victoria, 3122, Australia.

<sup>d</sup>Melbourne Centre for Nanofabrication, Australian National Fabrication Facility (ANFF), 151 Wellington Road, Clayton VIC 3168

\*Corresponding author

Elena P. Ivanova

School of Science, Faculty of Science, Engineering and Technology

Swinburne University of Technology

Melbourne, Australia; email: [eivanova@swin.edu.au](mailto:eivanova@swin.edu.au)

## Adhesion of RBCs on Model Surfaces as a function of Time

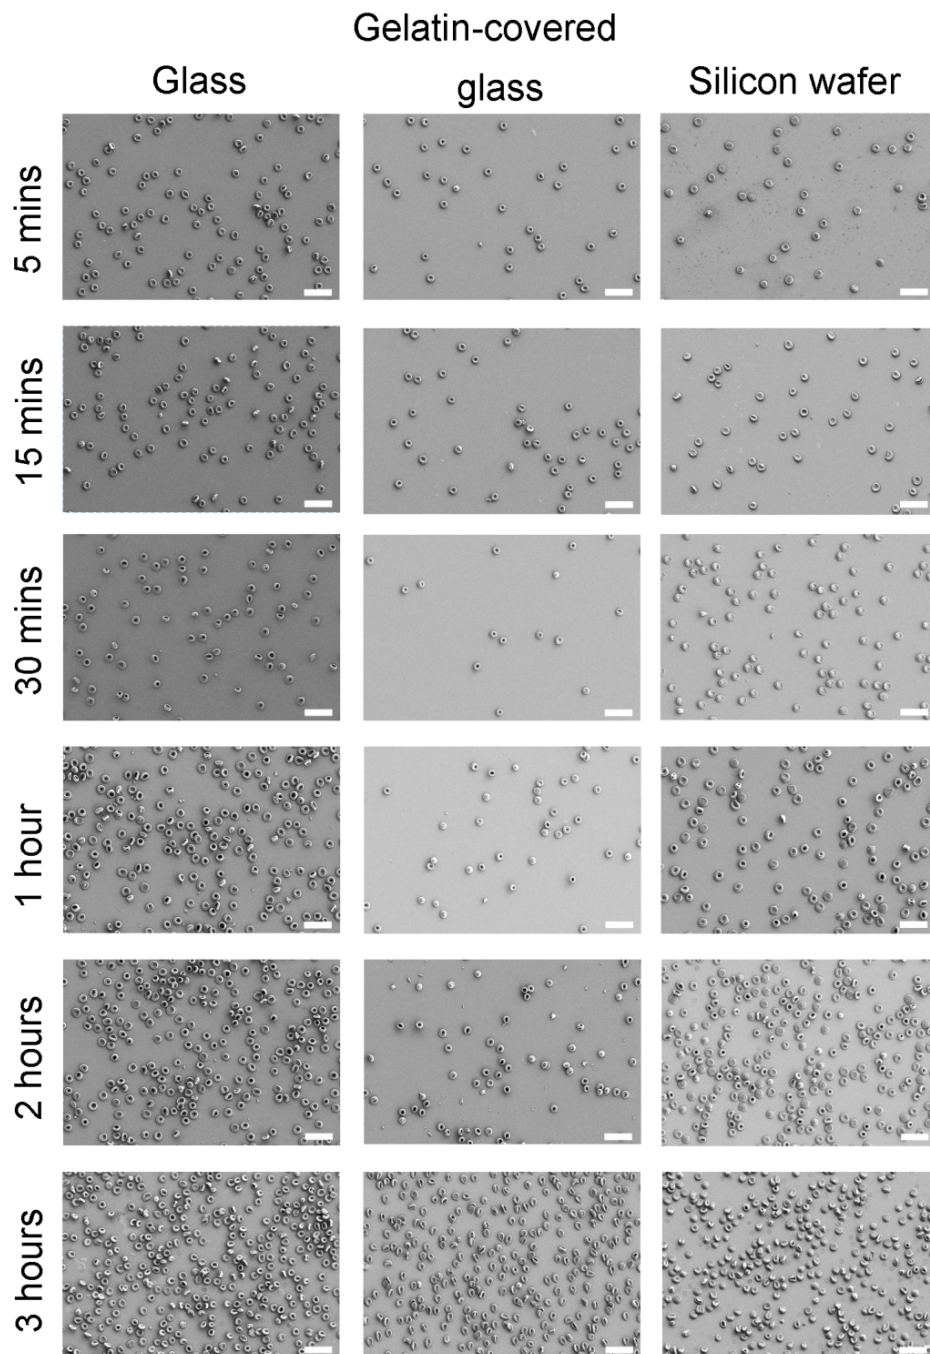

**Figure S1.** Typical SEM images of dynamic interactions of erythrocytes with three control surfaces: glass, gelatin covered glass and silicon wafer, over 3 hours. Images were selected as being representative from 10 different areas of 3 independent experiments. Scale bar is 20  $\mu\text{m}$ .

## Attachment Density on Control Surfaces

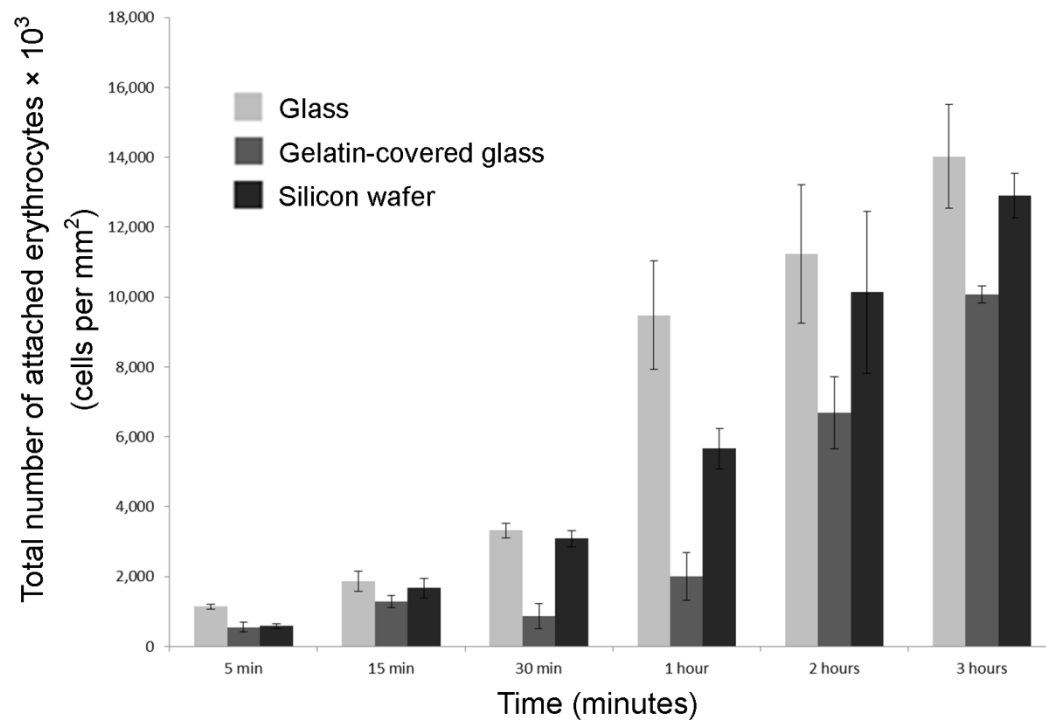

**Figure S2.** Quantification of the dynamic attachment of erythrocytes on control surfaces.

## Confocal Scanning Images of RBCs on Control Surfaces

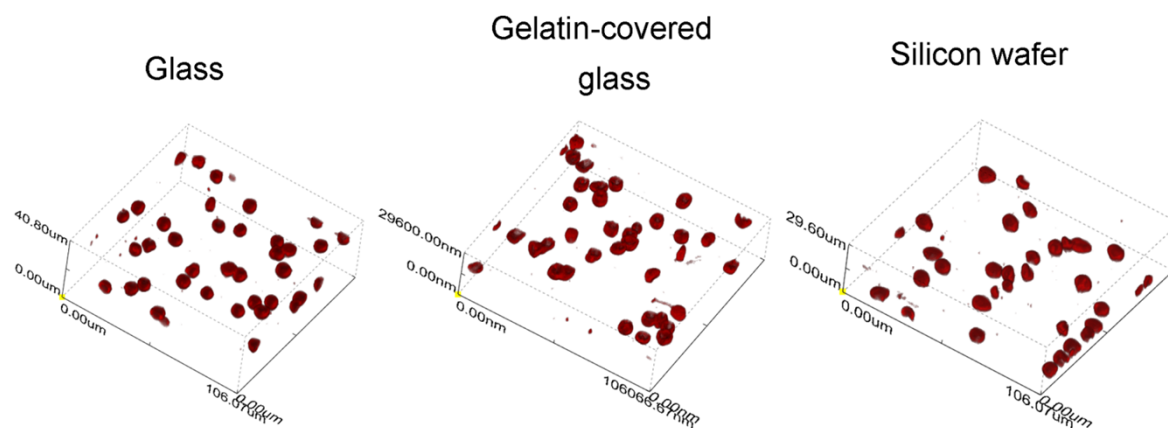

**Figure S3.** CLSM images of erythrocyte attachment on the three control surfaces. Cells were stained with 1,1'-dioctadecyl-3,3,3',3'-tetramethylindocarbocyanine perchlorate and imaged after 30 minutes of incubation on the surfaces.

## Real Time Visualisations of RBC Attachment on bSi Surfaces

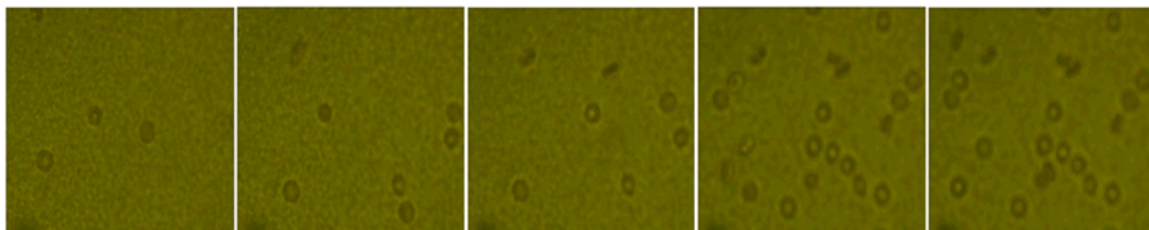

**Figure S4.** Real time interactions (video) of erythrocyte attachment to bSi. Optical images showed cells appearing in the frames when in contact with the bSi surface, and disappearing after rupture when they moved out of camera focus.

**Video V1.** Optical video microscopy of interactions above over 20 min illustrates RBC adhesion, rupture and disappearance from field of view.
